# Supplementary material for: Pericentric chromatin loops function as a nonlinear spring in mitotic force balance
Source: PubMed Central journal article supplement — J Cell Biol. 2013 Mar 18;200(6):757–72. doi: 10.1083/jcb.201208163 (PMC3601350; doi:10.1083/jcb.201208163), 2013-03-18
Supplement: supp_jcb.201208163_JCB_201208163_sm.pdf [file supp_jcb.201208163_JCB_201208163_sm.pdf]

Stephens et al., <http://www.jcb.org/cgi/content/full/jcb.201208163/DC1>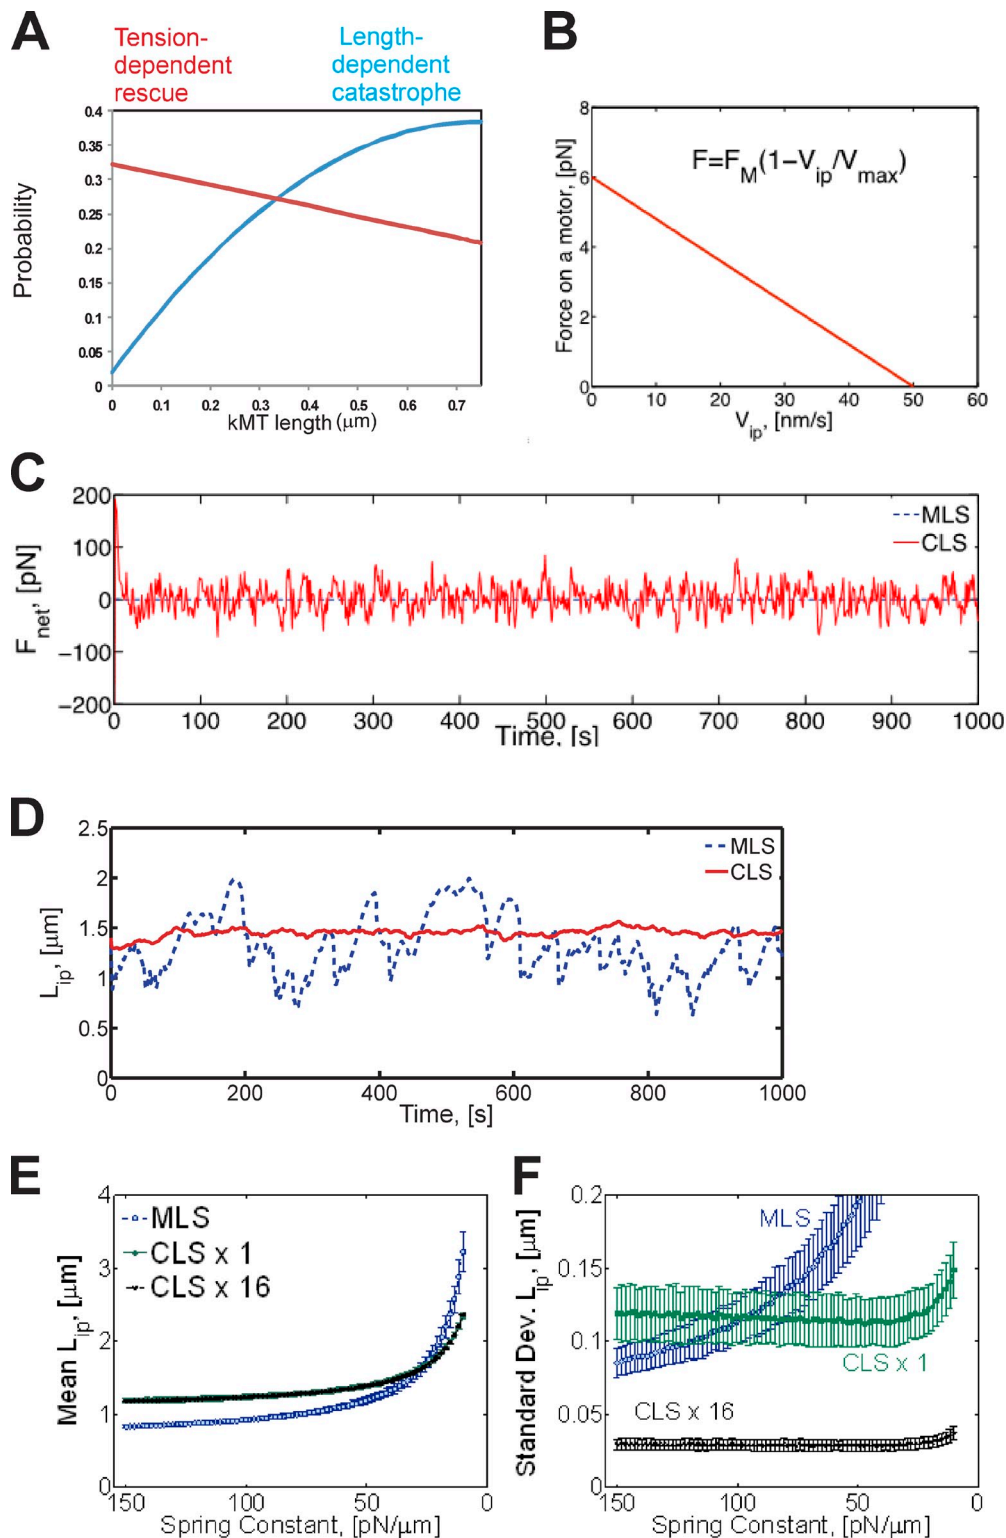

Figure S1. **Addition of experimentally measured kMT dynamics and motor on/off rates maintains trends of a minimal model.** (A) Fitted probabilities of switching kMT states based on tension-dependent rescue and length-dependent catastrophe (Gardner et al., 2005). (B) Motor velocity versus force on motor determined as a linear equation between maximum velocity (50 nm/s) and motor stall force (6 pN). (C)  $F_{net}$  in the MLS and CLS models. (D) Spindle length over time for MLS and CLS models. (E and F) Mean spindle length (E) and spindle variation (F) over a time lapse for MLS, CLS one spring, and CLS 16 springs upon decreasing the spring constant.

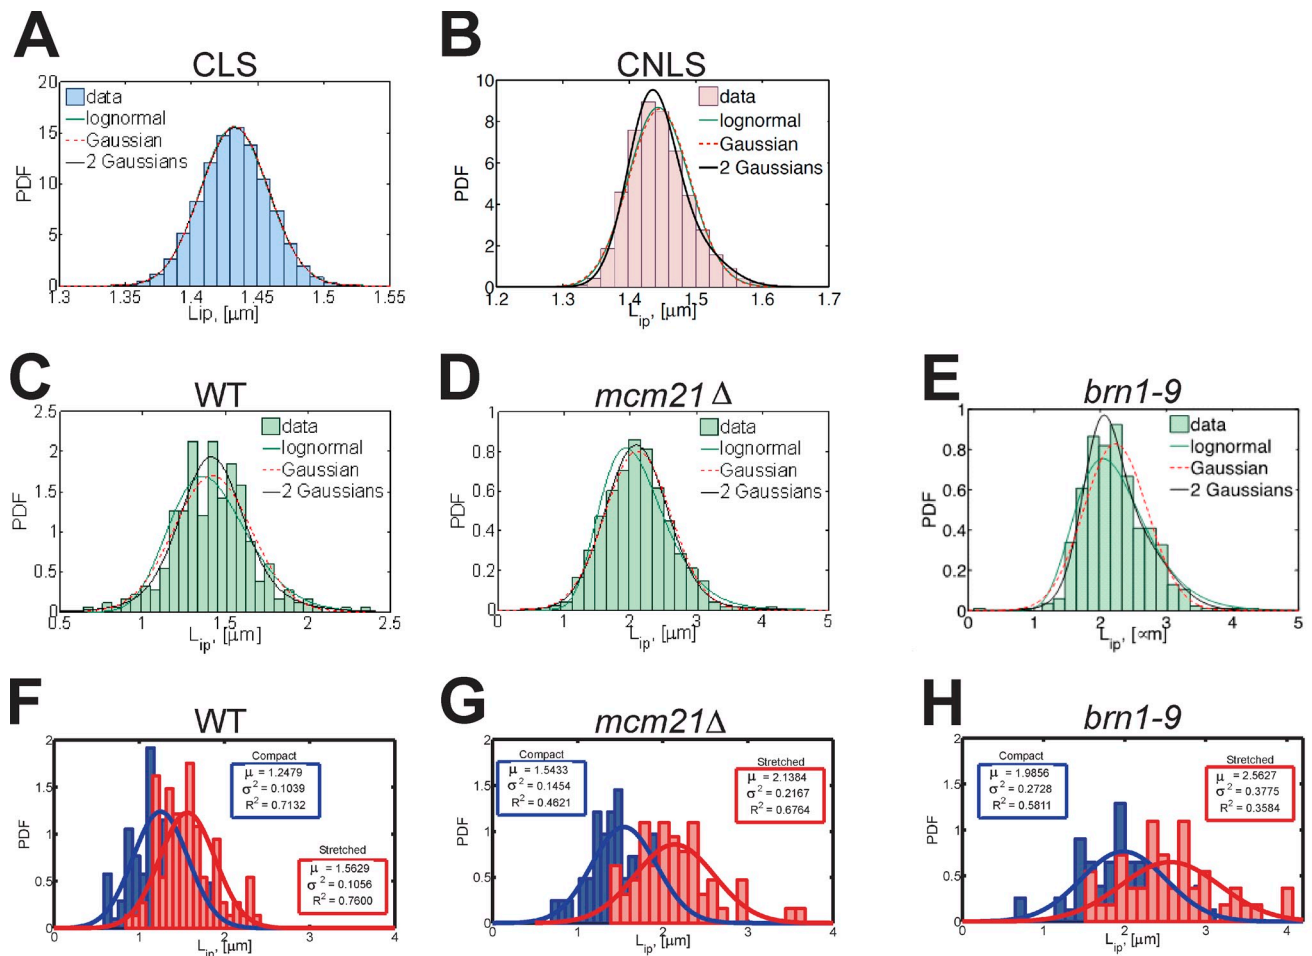

Figure S2. **Spindle length histograms of simulations and experimental conditions.** (A–E) Probability distribution functions of CLS WT (A) CNLS WT (B), experimental WT (C), experimental *mcm21* $\Delta$  depletion of pericentric cohesin (D), and experimental *brn1-9* depletion of condensin (E). Each histogram was fitted with a lognormal (green line), one Gaussian (red dotted line), and two Gaussian (black line). Lognormal and one Gaussian represent unimodal, whereas two Gaussian represents bimodal.  $R^2$  values are given in Table S2. (F–H) Histograms of the spindle length distributions in WT (F), *mcm21* $\Delta$  (G), and *brn1-9* (H) cells with only compact LacO arrays versus cells with stretched LacO arrays. These graphs reveal two distinct populations in both WT and mutant cells (WT:  $n = 218$ ,  $P < 1.5 \times 10^{-11}$ ; *mcm21* $\Delta$ :  $n = 106$ ,  $P < 1.3 \times 10^{-10}$ ; *brn1-9*:  $n = 106$ ,  $P < 1 \times 10^{-6}$ ). Spindles with stretched LacO arrays are on average 500 nm longer and exhibit increased variance relative to spindles with compact LacO arrays. PDF, probability distribution function.

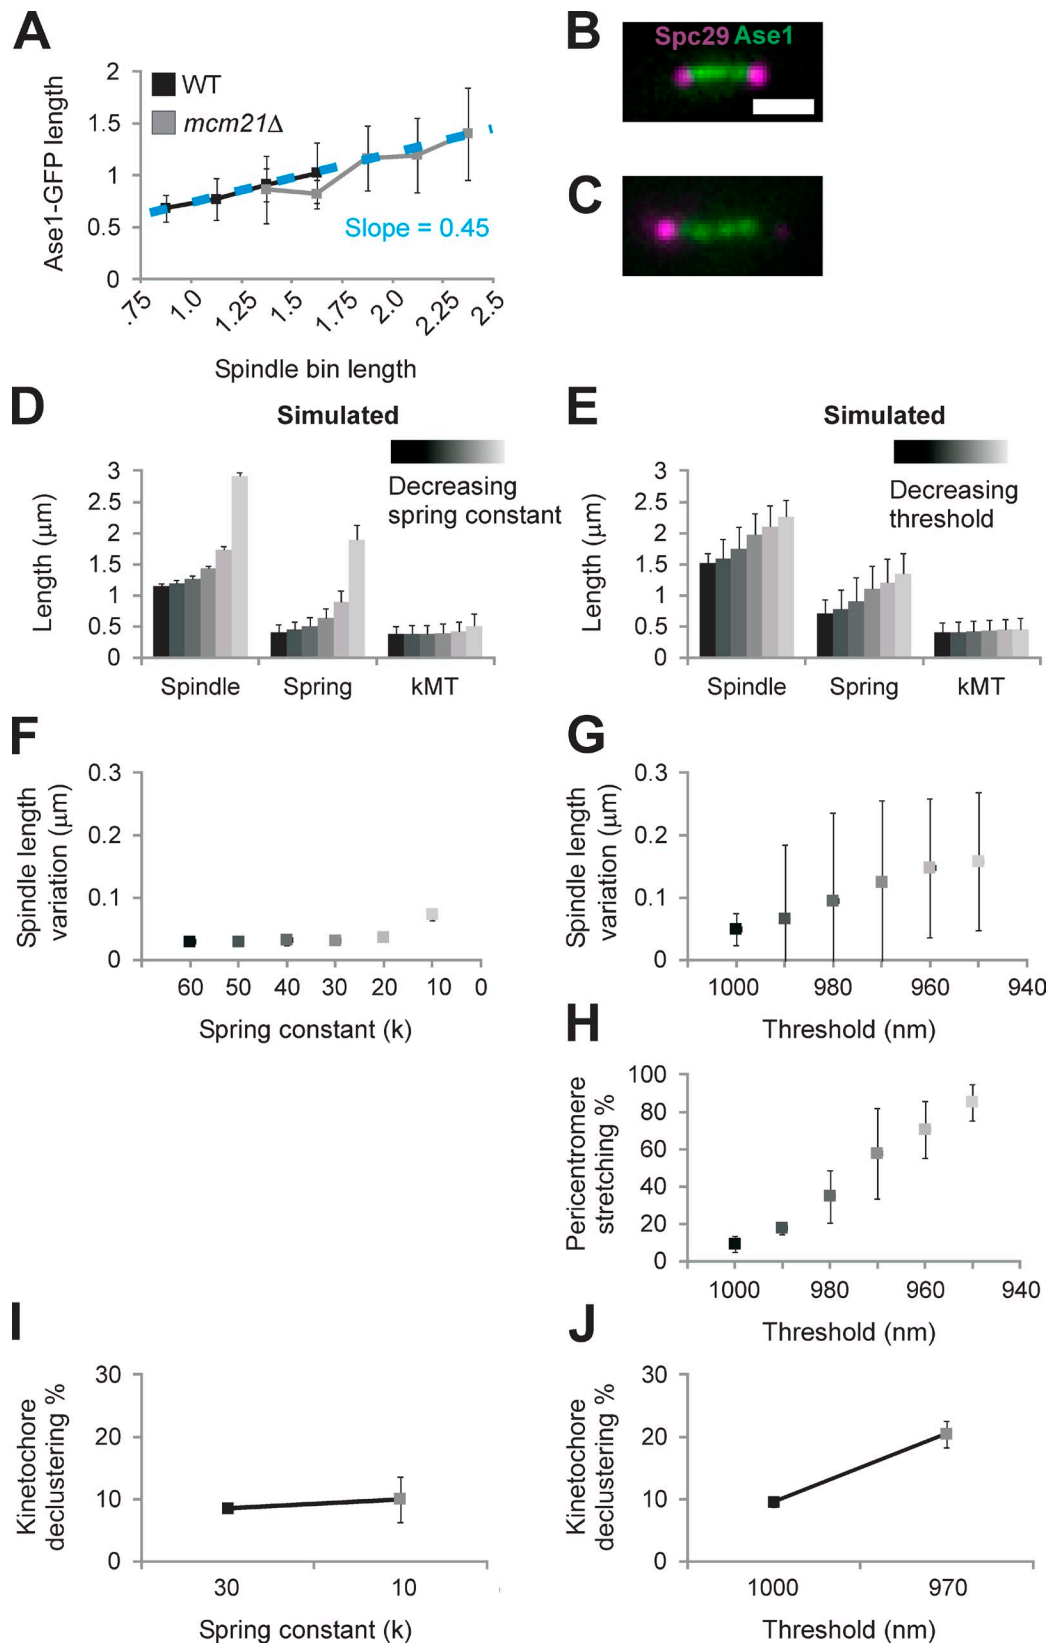

Figure S3. **The model is insensitive to overlap dynamics.** (A) Length of the Ase1-GFP signal for increasing spindle lengths in WT ( $n = 51$ ) and *mcm21Δ* ( $n = 46$ ) spindles. Ase1-GFP signal increases proportionally with spindle length with a slope of 0.45 (dotted blue line). (B and C) Example images of WT (B) and *mcm21Δ* (C) spindles labeled with Ase1-GFP and Spc29-RFP. (D–J) Simulations were run for the linear (CLS model, left column; D, F, and I) and piecewise (CNLS model, right column; E, G, H, and J) with increasing overlap zone dynamics from A. Spindle length (D and E), spindle variation (F and G), pericentromere stretching (H), and declustering (I and J) showed similar trends compared with the constant overlap zone (see Fig. 2, B and C, CLS and CNLS models, respectively). Error bars represent standard deviation. Bar, 1 μm.

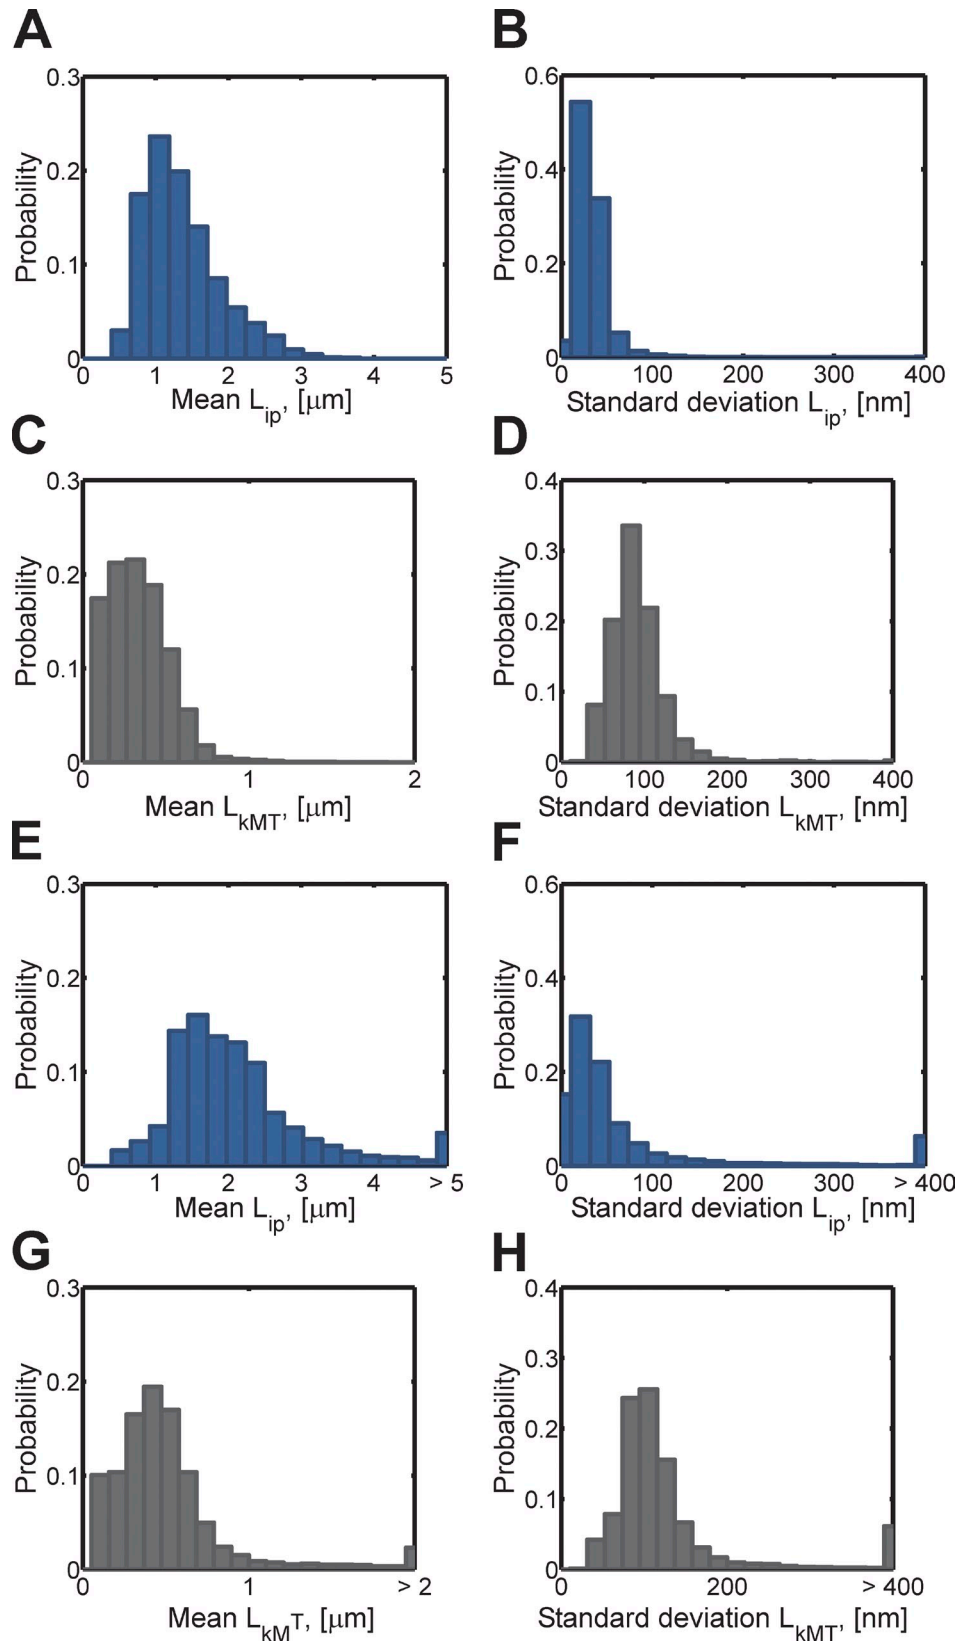

Figure S4. **Model sensitivity analysis reveals robustness of the model.** Values for the seven parameters are chosen randomly within each corresponding interval outlined in Table S3. (A–H) 10,000 random searches were performed using the CNLS with cross-links model with either a constant (A–D) and increasing (E–H) overlap region ( $L_{ip}$ ). Histograms of spindle length ( $L_{ip}$ ) mean (A and E) and standard deviation (B and F) and kMTs ( $L_{kMT}$ ) length mean (C and G) and standard deviation (D and H) are shown. Clustering of spindle lengths in the histograms indicate that model predictions are tolerant to variations over wide intervals of parameter space. Spindle lengths  $>3 \mu\text{m}$  are considered as outliers. Sensitivity analysis of a model with a constant overlap zone generated outliers in  $<1\%$  of simulations (74 out of 10,000), whereas a model with an overlap zone that increases proportionally with spindle length (Fig. S3) generated outliers in  $\sim 14\%$  of simulations (1,379 out of 10,000).

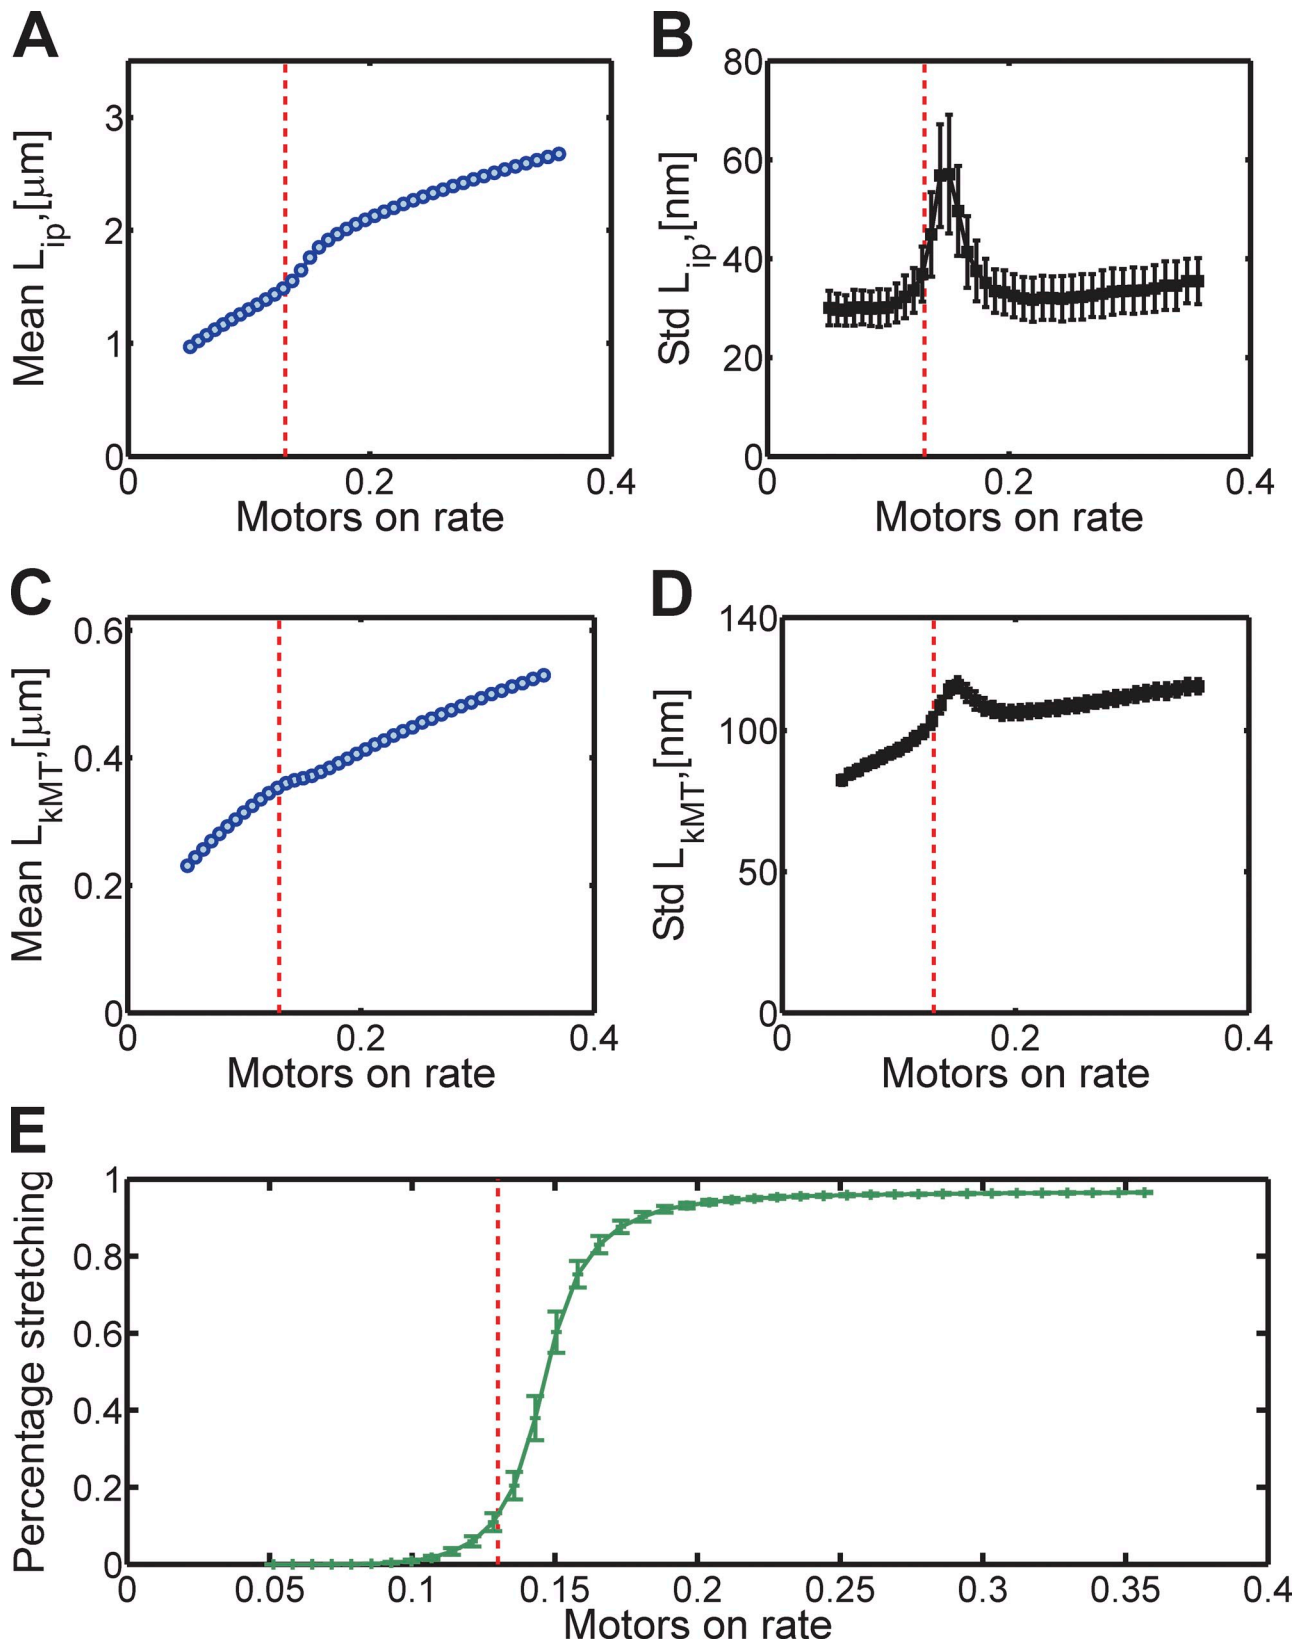

Figure S5. **The threshold for loop stretching disproportionately affects spindle length variation.** An example of single parameter analysis for the CNLS with cross-links model. (A–E) The effect of changing motor on rate on mean spindle length (A), standard deviation of spindle length (B), mean kMT length (C), standard deviation of kMT length (D), and loop stretching (E). Red lines denote WT default values. Spindle length varies monotonically with motor on rate. As expected, the addition of motors increases the extensional force, and therefore, spindle length increases. (B and D) In contrast, the standard (Std) deviation of spindle and kMT length is not monotonic. (E) A peak in standard deviation is coincident with threshold values in which 50% of the springs are stretched. This indicates that the threshold value is a sensitive parameter in the model.

Table S1. Variable list

| Variable Name                   | Label        | Description                                                       | Default values                         | Parameter source                                                  | In vivo values                                                                                                                           | Parameter relationships                                                                                                          | Citations                                                                                              |
|---------------------------------|--------------|-------------------------------------------------------------------|----------------------------------------|-------------------------------------------------------------------|------------------------------------------------------------------------------------------------------------------------------------------|----------------------------------------------------------------------------------------------------------------------------------|--------------------------------------------------------------------------------------------------------|
| <b>Spindle length</b>           |              |                                                                   |                                        |                                                                   |                                                                                                                                          |                                                                                                                                  |                                                                                                        |
| Spindle length                  | $L_{ip}$     | Length of the spindle, from pole to pole                          | $1.5 \times 10^{-6}$ m                 | Measured; minimum $0.8 \times 10^{-6}$ m because of overlap       | WT: $1.5 \times 10^{-6}$ m                                                                                                               | $L_{ip}$ is the integral of $V_{ip}$ $L_{ip} L_{kMT} = L_{spring}$                                                               | Winey et al., 1995; Stephens et al., 2011                                                              |
| Spindle velocity                | $V_{ip}$     | The speed at which the spindle grows/shrinks                      | —                                      | Measured; observed range of $-3.5$ – $3.5 \times 10^{-6}$ m/min   | Shortening: $.54$ – $2.34 \times 10^{-6}$ m/min;<br>Growth: $.42$ – $1.6 \times 10^{-6}$ m/min;<br>No spring: $3.5 \times 10^{-6}$ m/min | $V_{ip} = 3 \times 10^{-6}$ m/min $\times [1 + ((F_k + F_{drag})/F_{ip})]$                                                       | Motor speed: Hunt et al., 1994; Svoboda and Block, 1994.<br>In vivo: Harrison et al., 2009; this paper |
| Outward motor force             | $F_{ip}$     | Outward force from the motors                                     | $2$ – $3 \times 10^{-10}$ N            | —                                                                 | —                                                                                                                                        | $F_{ip} = D \times (6 \times 10^{-12}$ N)                                                                                        | Outward motor force                                                                                    |
| Inward spring force             | $F_k$        | Inward force from the springs                                     | $-2$ to $-3 \times 10^{-10}$ N         | —                                                                 | —                                                                                                                                        | $\Sigma F_k \rightarrow F_k 16 = F_k$                                                                                            |                                                                                                        |
| Drag force                      | $F_{drag}$   | Drag force exerted on the spindle by viscosity                    | $-5$ – $5 \times 10^{-12}$ N           | —                                                                 | —                                                                                                                                        | $V_{ip} \times C_{drag} = F_{drag}$                                                                                              |                                                                                                        |
| Drag coefficient                | $C_{drag}$   | Drag coefficient                                                  | $3 \times 10^5$ Ns/m                   | Measured; model insensitive                                       | $175$ poise $\times L_{ip}$                                                                                                              | $V_{ip} \times C_{drag} = F_{drag}$ and $F_{ip} + F_k + F_{drag} = F_{net}$                                                      | Fisher et al., 2009                                                                                    |
| <b>ipMTs and motors</b>         |              |                                                                   |                                        |                                                                   |                                                                                                                                          |                                                                                                                                  |                                                                                                        |
| Overlap zone                    | $L_{lap}$    | Length of the overlap zone                                        | $0.8 \times 10^{-6}$ N/m               | Measured; constant                                                | —                                                                                                                                        | $L_{lap}$ is involved in single to double and free to single                                                                     | Winey et al., 1995; Schuyler et al., 2003                                                              |
| Free motors                     | Free/ $U$    | Number of motors that are not bound to any microtubules           | 400                                    | Total measured (bound and free); initial distribution insensitive | —                                                                                                                                        | Involved in single to double and single to free                                                                                  | Unpublished data; J. Lawrimore, personal communication                                                 |
| Single-bound ipMT               | Single ipMT  | Number of motors singly bound to the ipMT                         | 35 ( $\times 4$ ipMT pairs, 140 total) | Initial distribution insensitive                                  | —                                                                                                                                        | Involved in single to free and free to single ipMT                                                                               | Single-bound interpolar motors                                                                         |
| Single-bound kinetochore motors | Single kMT   | Number of motors singly bound to the kMTs                         | 150                                    | Initial distribution insensitive                                  | —                                                                                                                                        | Involved in single to free and free to single kMT                                                                                |                                                                                                        |
| Double-bound motors             | $D$          | Number of doubly bound motors in the overlap region ( $L_{lap}$ ) | 10 ( $\times 4$ ipMT pairs, 40 total)  | Initial distribution insensitive                                  | —                                                                                                                                        | $F_{ip} = D \times N_{motors}$ ; $D$ depends on functions double to single, free to single, single to double, and single to free |                                                                                                        |
| Motor force                     | $F_m$        | The force each individual motor exerts on the microtubule         | $6 \times 10^{-12}$ N                  | Measured in vitro stall force                                     | —                                                                                                                                        | $F_{ip} = D \times F_m$                                                                                                          | Hunt et al., 1994; Svoboda and Block, 1994                                                             |
| <b>kMTs and Springs</b>         |              |                                                                   |                                        |                                                                   |                                                                                                                                          |                                                                                                                                  |                                                                                                        |
| kMT length                      | $L_{kMT}$    | Length of each kMT                                                | $350 \times 10^{-9}$ m                 | Measured; $50 \times 10^{-9}$ m minimum from EM                   | $350 \times 10^{-9}$ m, mean kMT                                                                                                         | $L_{kMT}$ switches stochastically between growth and shrinkage. Switching depends on $F_k$ and $L_{kMT}$ , respectively          | Winey et al., 1995; Gardner et al., 2005                                                               |
| Growth rate                     | $R_{gro}$    | Rate of growth for kMT                                            | $17 \times 10^{-9}$ m/s                | Measured (probability to switch states fitted)                    | $17 \times 10^{-9}$ m/s                                                                                                                  | The length added to each kMT is the integral of $R_{gro}$                                                                        | Gardner et al., 2005                                                                                   |
| Shrinking rate                  | $R_{shr}$    | Rate of shrinking for kMT                                         | $25 \times 10^{-9}$ m/s                | Measured (probability to switch states fitted)                    | $25 \times 10^{-9}$ m/s                                                                                                                  | The length subtracted from each kMT is the integral of $R_{shr}$                                                                 | Gardner et al., 2005                                                                                   |
| Spring length                   | $L_{spring}$ | Length of each chromatin spring                                   | $800 \times 10^{-9}$ m                 | Measured aggregate interkinetochore distance                      | $800 \times 10^{-9}$ m                                                                                                                   | $L_{spring} = L_{ip} - (L_{kMT}^{left} + L_{kMT}^{right})$                                                                       | Bouck and Bloom, 2007; Stephens et al., 2011                                                           |

Table S1. Variable list (Continued)

| Variable Name                 | Label            | Description                                       | Default values                       | Parameter source                          | In vivo values                                     | Parameter relationships                                                                                                                                      | Citations              |
|-------------------------------|------------------|---------------------------------------------------|--------------------------------------|-------------------------------------------|----------------------------------------------------|--------------------------------------------------------------------------------------------------------------------------------------------------------------|------------------------|
| Spring force                  | $F_k^{ind}$      | Force of individual chromatin spring              | –                                    | –                                         | –                                                  | If $L_{spring} < L_{threshold}$ , $F_k^{ind} = k_1(L_{spring} - L_{rest1})$ . If $L_{spring} \geq L_{threshold}$ , $F_k^{ind} = k_2(L_{spring} - L_{rest2})$ |                        |
| Looped spring constant        | $k_1$            | Spring constant of looped chromatin               | $30 \times 10^{-6}$ N/m              | Free; explored $5-150 \times 10^{-6}$ N/m | –                                                  | If $L_{spring} < L_{threshold}$ , $F_k^{ind} = k_1(L_{spring} - L_{rest1})$                                                                                  |                        |
| Unlooped spring constant      | $k_2$            | Spring constant of unlooped chromatin             | –                                    | –                                         | –                                                  | $k_2 = k_1 \times [L_1 / (L_1 + L_{openloop})]$ . If $L_{spring} \geq L_{threshold}$ , $F_k^{ind} = k_2(L_{spring} - L_{rest2})$                             |                        |
| Looped rest length            | $L_{rest1}$      | Rest length of looped under no force              | $200 \times 10^{-9}$ m               | Estimated from measured                   | $<250 \times 10^{-9}$ m                            | If $L_{spring} < L_{threshold}$ , $F_k^{ind} = k_1(L_{spring} - L_{rest1})$                                                                                  | Bystricky et al., 2004 |
| Unlooped rest length          | $L_{rest2}$      | Rest length of unlooped under no force            | $650 \times 10^{-9}$ m               | –                                         | $>250 \times 10^{-9}$ m                            | $L_{rest2} = L_{rest1} + L_{openloop}$                                                                                                                       |                        |
| Threshold                     | $L_{threshold}$  | The spindle length at which the loop comes undone | $975 \times 10^{-9}$ m (best-fit WT) | Free; explored $1.1-0.8 \times 10^{-6}$ m | –                                                  | Deterministic length at which spring switches from $k_1$ to $k_2$ and $L_{rest1}$ to $L_{rest2}$                                                             |                        |
| Loop length                   | $L_{openloop}$   | The length of the loop                            | $450 \times 10^{-9}$ m               | Estimated from measured <sup>a</sup>      | 10-kb LacO = $450 \times 10^{-9}$ m of 11-nm fiber | Used to calculate $k_2$ and $L_{rest2}$                                                                                                                      | Stephens et al., 2011  |
| Loop stretching               |                  | The loop in the spring has come undone            | –                                    | True or false                             | 10% of the time in WT                              | If stretched is true, the spring is not looped. If stretched is false, the spring is looped.                                                                 |                        |
| Cross-linking spring constant | $k_{cross-link}$ | Spring constant of cross-links                    | $9 \times 10^{-6}$ N/m (best-fit WT) | Free; explored $0-15 \times 10^{-6}$ N/m  | –                                                  | $F_k^{cross-link} = F_k - k_{cross-link}(L_{spring}^{n-1} - L_{spring}^{n+1})$                                                                               | This paper             |

<sup>a</sup>WT mean axial distance between a 1.7-kb LacO and a 6.8-kb LacO focus translates into a 102-bp/nm compaction. The mean axial distance between a WT 1.7-kb LacO to a stretched 6.8-kb LacO has an increase in distance (50–189 nm), which translates into a 27-bp/nm compaction and is consistent with extended nucleosomal compacted chromatin (11-nm fiber). Minus signs indicate not available.

Table S2. **Statistics of the Gaussian distributions shown in Fig. S2**

| R <sup>2</sup> fit | WT            | mcm21D        | brn1-9        | CLS          | CNLS          |
|--------------------|---------------|---------------|---------------|--------------|---------------|
| One Gaussian       | 0.8895        | 0.9732        | 0.9364        | 0.9971       | 0.9788        |
| Lognormal          | 0.8699        | 0.9502        | 0.9457        | <b>0.998</b> | 0.9813        |
| Two Gaussians      | <b>0.8977</b> | <b>0.9792</b> | <b>0.9742</b> | <b>0.998</b> | <b>0.9971</b> |
| <i>n</i>           | 317           | 756           | 496           | 9,000        | 9,000         |

Bold numbers denote best fit.

Table S3. **Sensitivity analysis parameters and range**

| Parameter                                       | Default | Min   | Max   | Equation                                         |
|-------------------------------------------------|---------|-------|-------|--------------------------------------------------|
| MT rescue rate (1/s)                            | 0.017   | 0.01  | 0.03  |                                                  |
| MT catastrophe rate (1/s)                       | 0.025   | 0.015 | 0.035 |                                                  |
| Single to double on rate (1/s)                  | 0.13    | 0.005 | 0.16  |                                                  |
| Double to single off rate (1/s)                 | 0.3     | 0.2   | 0.4   |                                                  |
| Overlap length constant $C_0$ ( $\mu\text{m}$ ) | 0.8     | 0.5   | 1     | $L_{lap} = C_0$                                  |
|                                                 | 0.5     | 0.3   | 0.7   | $\Delta L_{lap} = C_0 \Delta L_{ip}$             |
| Rescue probability $C_1$                        | 1       | 0.2   | 1.8   | $p_r = 0.21 - C_1 \times 9.5 F_k$                |
| Catastrophe probability $C_1$                   |         |       |       | $p_c = 0.27 + C_1 \times 0.442 (l_{kMT} - 0.34)$ |

MT, microtubule.

Table S4. **MLS model parameters**

| Parameter                       | Notation   | Default value          |
|---------------------------------|------------|------------------------|
| Spring constant                 | $k_{sp}$   | 22 pN/ $\mu\text{m}$   |
| Drag coefficient                | $C_{drag}$ | 30 pN/s/ $\mu\text{m}$ |
| Motor detachment rate           | $k_{off}$  | 0.25 motors/s          |
| Motor attachment rate           | $k_{on}$   | 0.5 motors/s           |
| Mean of $l_{kMT}$               | $L_m$      | 0.4 $\mu\text{m}$      |
| Standard deviation of $l_{kMT}$ | $\sigma_m$ | 0.088 $\mu\text{m}$    |
| Spring rest length              | $l_r$      | 0.2 $\mu\text{m}$      |

Table S5. **Motor on/off rates**

| Rate        | Description                                     | Dependence                        | Value                 | Notes |
|-------------|-------------------------------------------------|-----------------------------------|-----------------------|-------|
| $k_{on,1}$  | Attachment rate of single-bound motors to ipMTs | Constant                          | $0.13 \text{ s}^{-1}$ | a     |
| $k_{on,2}$  | Attachment rate of unbound motors to ipMTs      | $L_{ip,i}$ $k_{kMT}^{left,right}$ |                       | b     |
| $k_{on,3}$  | Attachment rate of unbound motors to kMTs       | $L_{ip,i}$ $k_{kMT}^{left,right}$ |                       | b     |
| $k_{off,1}$ | Detachment rate of double-bound motors          | Constant                          | $0.3 \text{ s}^{-1}$  | c     |
| $k_{off,2}$ | Detachment rate of single-bound motors          | Constant                          | $0.3 \text{ s}^{-1}$  | c     |

a, b, and c refer to corresponding labels in Materials and methods subsection Motor dynamics.



## References

- Bouck, D.C., and K. Bloom. 2007. Pericentric chromatin is an elastic component of the mitotic spindle. *Curr. Biol.* 17:741–748. <http://dx.doi.org/10.1016/j.cub.2007.03.033>
- Bystricky, K., P. Heun, L. Gehlen, J. Langowski, and S.M. Gasser. 2004. Long-range compaction and flexibility of interphase chromatin in budding yeast analyzed by high-resolution imaging techniques. *Proc. Natl. Acad. Sci. USA.* 101:16495–16500. <http://dx.doi.org/10.1073/pnas.0402766101>
- Fisher, J.K., M. Ballenger, E.T. O'Brien, J. Haase, R. Superfine, and K. Bloom. 2009. DNA relaxation dynamics as a probe for the intracellular environment. *Proc. Natl. Acad. Sci. USA.* 106:9250–9255. <http://dx.doi.org/10.1073/pnas.0812723106>
- Gardner, M.K., C.G. Pearson, B.L. Sprague, T.R. Zarzar, K. Bloom, E.D. Salmon, and D.J. Odde. 2005. Tension-dependent regulation of microtubule dynamics at kinetochores can explain metaphase congression in yeast. *Mol. Biol. Cell.* 16:3764–3775. <http://dx.doi.org/10.1091/mbc.E05-04-0275>
- Harrison, B.D., M.L. Hoang, and K. Bloom. 2009. Persistent mechanical linkage between sister chromatids throughout anaphase. *Chromosoma.* 118:633–645. <http://dx.doi.org/10.1007/s00412-009-0224-6>
- Hunt, A.J., F. Gittes, and J. Howard. 1994. The force exerted by a single kinesin molecule against a viscous load. *Biophys. J.* 67:766–781. [http://dx.doi.org/10.1016/S0006-3495\(94\)80537-5](http://dx.doi.org/10.1016/S0006-3495(94)80537-5)
- Schuyler, S.C., J.Y. Liu, and D. Pellman. 2003. The molecular function of Ase1p: evidence for a MAP-dependent midzone-specific spindle matrix. *J. Cell Biol.* 160:517–528. <http://dx.doi.org/10.1083/jcb.200210021>
- Stephens, A.D., J. Haase, L. Vicci, R.M. Taylor II, and K. Bloom. 2011. Cohesin, condensin, and the intramolecular centromere loop together generate the mitotic chromatin spring. *J. Cell Biol.* 193:1167–1180. <http://dx.doi.org/10.1083/jcb.201103138>
- Svoboda, K., and S.M. Block. 1994. Force and velocity measured for single kinesin molecules. *Cell.* 77:773–784. [http://dx.doi.org/10.1016/0092-8674\(94\)90060-4](http://dx.doi.org/10.1016/0092-8674(94)90060-4)
- Winey, M., C.L. Mamay, E.T. O'Toole, D.N. Mastrorarde, T.H. Giddings Jr., K.L. McDonald, and J.R. McIntosh. 1995. Three-dimensional ultrastructural analysis of the *Saccharomyces cerevisiae* mitotic spindle. *J. Cell Biol.* 129:1601–1615. <http://dx.doi.org/10.1083/jcb.129.6.1601>

**A PDF file is provided that shows the mitotic spindle simulation manual.**

**A ZIP file is provided containing the mathematical model.**
